# Supplementary material for: Uncertainty analysis of the rate of change of quantile due to global warming using uncertainty analysis of non-stationary frequency model of peak-over-threshold series
Source: Copernicus journal article supplement (doi:10.5194/hess-2020-167), 2020-05-12
Supplement: Supplementary file [file hess-2020-167-AC1-supplement.zip]

Table S1. Parameter estimation of stationary GP distribution at other sites

| Site        | Parameter | PWM       | MH        |
|-------------|-----------|-----------|-----------|
| Ghangreung  | $\alpha$  | 30.4736   | 30.6887   |
|             | k         | -0.2770   | -0.2885   |
|             | nllh      | 1256.9933 | 1257.0521 |
| Incheon     | $\alpha$  | 34.1123   | 35.2850   |
|             | k         | -0.1391   | -0.1294   |
|             | nllh      | 1112.4150 | 1112.4106 |
| Chupuryeong | $\alpha$  | 28.5773   | 27.6439   |
|             | k         | -0.0319   | -0.0836   |
|             | nllh      | 819.7220  | 819.7751  |
| Pohang      | $\alpha$  | 28.4154   | 28.1192   |
|             | k         | -0.1627   | -0.1845   |
|             | nllh      | 859.2326  | 859.2515  |
| Daegu       | $\alpha$  | 29.5569   | 28.6007   |
|             | k         | -0.0310   | -0.0850   |
|             | nllh      | 755.3478  | 755.5559  |
| Jeonju      | $\alpha$  | 26.9367   | 27.8984   |
|             | k         | -0.1330   | -0.1234   |
|             | nllh      | 970.8081  | 970.7840  |
| Ulsan       | $\alpha$  | 28.3941   | 28.3681   |
|             | k         | -0.2111   | -0.2362   |
|             | nllh      | 1171.6912 | 1171.7828 |
| Ghangju     | $\alpha$  | 32.1973   | 30.5867   |
|             | k         | -0.0325   | -0.0930   |
|             | nllh      | 1238.0525 | 1237.7390 |
| Mokpo       | $\alpha$  | 28.7419   | 27.6156   |
|             | k         | -0.0736   | -0.1334   |
|             | nllh      | 965.3405  | 965.4393  |
| Yeosu       | $\alpha$  | 31.2253   | 32.0783   |
|             | k         | -0.1524   | -0.1435   |

|      |          |           |           |
|------|----------|-----------|-----------|
|      | nllh     | 1453.0901 | 1453.0880 |
| Juju | $\alpha$ | 40.6917   | 42.0497   |
|      | k        | -0.1403   | -0.1348   |
|      | nllh     | 1174.6091 | 1174.5951 |

Table S2. Uncertainty of stationary and non-stationary frequency analysis

| Site          | factor   | Parameter  | stationary | non-stationary     |                     |
|---------------|----------|------------|------------|--------------------|---------------------|
|               |          |            |            | (DPT-based)        | (SAT-based)         |
| Ghangreung    | m-factor | $\alpha_1$ | 0.3875     | 0.3381             | 0.3791              |
|               |          | $\alpha_2$ |            | 0.6456             | 0.6974              |
|               |          | $\alpha$   |            | 0.3678             | 0.3689              |
|               |          | k          | 1.0455     | 0.9696             | 0.8855              |
|               | h-factor | 100-yr     | 1.0579     | 0.6762<br>(1.3801) | 0.55849<br>(1.2638) |
| Seoul         | m-factor | $\alpha_1$ | 0.3407     | 0.7127             | 0.7076              |
|               |          | $\alpha_2$ |            | 0.8588             | 0.9796              |
|               |          | $\alpha$   |            | 0.3349             | 0.3021              |
|               |          | k          | 1.4204     | 1.5613             | 0.8021              |
|               | h-factor | 100-yr     | 0.7421     | 0.5331<br>(1.0273) | 0.43832<br>(0.9335) |
| Incheon       | m-factor | $\alpha_1$ | 0.4087     | 0.7131             | 0.7591              |
|               |          | $\alpha_2$ |            | 0.8758             | 1.1438              |
|               |          | $\alpha$   |            | 0.3297             | 0.3886              |
|               |          | k          | 2.2183     | 1.6575             | 1.6657              |
|               | h-factor | 100-yr     | 0.8196     | 0.4713<br>(0.9679) | 0.6093<br>(0.9677)  |
| Chupungryeong | m-factor | $\alpha_1$ | 0.3515     | 0.8080             | 0.8261              |
|               |          | $\alpha_2$ |            | 1.3008             | 1.8752              |
|               |          | $\alpha$   |            | 0.3499             | 0.3655              |
|               |          | k          | 2.5913     | 2.0368             | 2.1806              |
|               | h-factor | 100-yr     | 0.5200     | 0.4482<br>(0.8598) | 0.54444<br>(0.8230) |
| Pohang        | m-factor | $\alpha_1$ |            | 0.8035             | 0.9505              |
|               |          | $\alpha_2$ |            | 1.1251             | 1.6701              |

|          |          |            |        |                    |                    |
|----------|----------|------------|--------|--------------------|--------------------|
|          |          | $\alpha$   | 0.4143 | 0.3579             | 0.4149             |
|          |          | k          | 1.4735 | 1.0175             | 1.2074             |
|          | h-factor | 100-yr     | 0.7113 | 0.5227<br>(1.0389) | 0.6169<br>(1.0144) |
| Daegu    | m-factor | $\alpha_1$ | 0.3832 | 0.8745             | 0.8512             |
|          |          | $\alpha_2$ |        | 1.1773             | 2.0205             |
|          |          | $\alpha$   |        | 0.3517             | 0.3718             |
|          |          | k          |        | 1.8217             | 1.8478             |
|          | h-factor | 100-yr     | 0.4910 | 0.3437<br>(0.7596) | 0.4207<br>(0.6998) |
| Jeonju   | m-factor | $\alpha_1$ | 0.3881 | 0.9989             | 0.9155             |
|          |          | $\alpha_2$ |        | 1.1253             | 1.2628             |
|          |          | $\alpha$   |        | 0.3779             | 0.3978             |
|          |          | k          |        | 1.7234             | 1.7513             |
|          | h-factor | 100-yr     | 0.6043 | 0.5273<br>(0.9540) | 0.5794<br>(0.9256) |
| Ulsan    | m-factor | $\alpha_1$ | 0.3878 | 0.7192             | 0.8763             |
|          |          | $\alpha_2$ |        | 1.5050             | 1.7133             |
|          |          | $\alpha$   |        | 0.3846             | 0.3947             |
|          |          | k          |        | 1.1898             | 1.1694             |
|          | h-factor | 100-yr     | 1.0592 | 0.7304<br>(1.0903) | 0.6912<br>(1.0305) |
| Ghwangju | m-factor | $\alpha_1$ | 0.3046 | 0.7866             | 0.7516             |
|          |          | $\alpha_2$ |        | 1.2788             | 2.0357             |
|          |          | $\alpha$   |        | 0.2947             | 0.3111             |
|          |          | k          |        | 1.8203             | 1.5323             |
|          | h-factor | 100-yr     | 0.4093 | 0.4290<br>(0.7991) | 0.4093<br>(0.6730) |

|       |          |            |        |                    |                    |
|-------|----------|------------|--------|--------------------|--------------------|
| Busan | m-factor | $\alpha_1$ | 0.3278 | 0.5463             | 0.6363             |
|       |          | $\alpha_2$ |        | 0.8700             | 1.0570             |
|       |          | $\alpha$   |        | 0.2920             | 0.3319             |
|       |          | k          |        | 1.5717             | 1.6513             |
|       | h-factor | 100-yr     | 0.7595 | 0.4771<br>(1.0274) | 0.4390<br>(0.9273) |
| Mokpo | m-factor | $\alpha_1$ | 0.3841 | 0.7528             | 0.5806             |
|       |          | $\alpha_2$ |        | 2.4953             | 2.7306             |
|       |          | $\alpha$   |        | 0.3823             | 0.3953             |
|       |          | k          |        | 1.8768             | 1.5854             |
|       | h-factor | 100-yr     | 0.7428 | 0.5121<br>(0.7114) | 0.4494<br>(0.5628) |
| Yeosu | m-factor | $\alpha_1$ | 0.3424 | 0.6458             | 0.7046             |
|       |          | $\alpha_2$ |        | 0.7659             | 0.9428             |
|       |          | $\alpha$   |        | 0.2979             | 0.3191             |
|       |          | k          |        | 1.7258             | 1.8294             |
|       | h-factor | 100-yr     | 0.6175 | 0.4021<br>(1.1322) | 0.4556<br>(1.0251) |
| Jeju  | m-factor | $\alpha_1$ | 0.3938 | 0.6135             | 0.7120             |
|       |          | $\alpha_2$ |        | 0.6645             | 0.8296             |
|       |          | $\alpha$   |        | 0.3234             | 0.3344             |
|       |          | k          |        | 1.8819             | 1.5639             |
|       | h-factor | 100-yr     | 0.9153 | 0.4480<br>(1.1041) | 0.4986<br>(1.1215) |

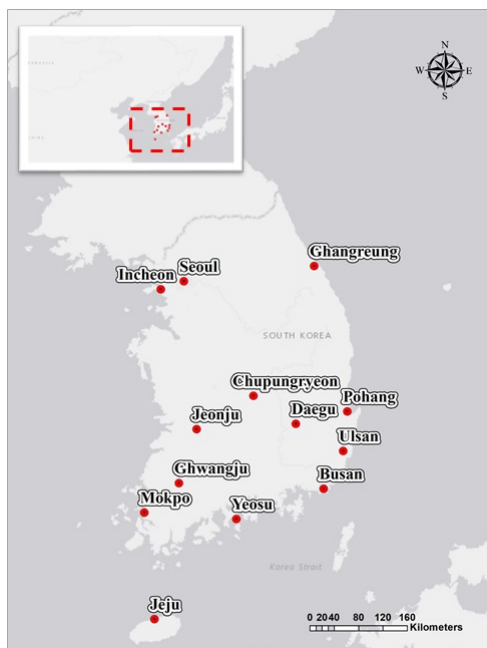

Figure S1. Location of study sites.

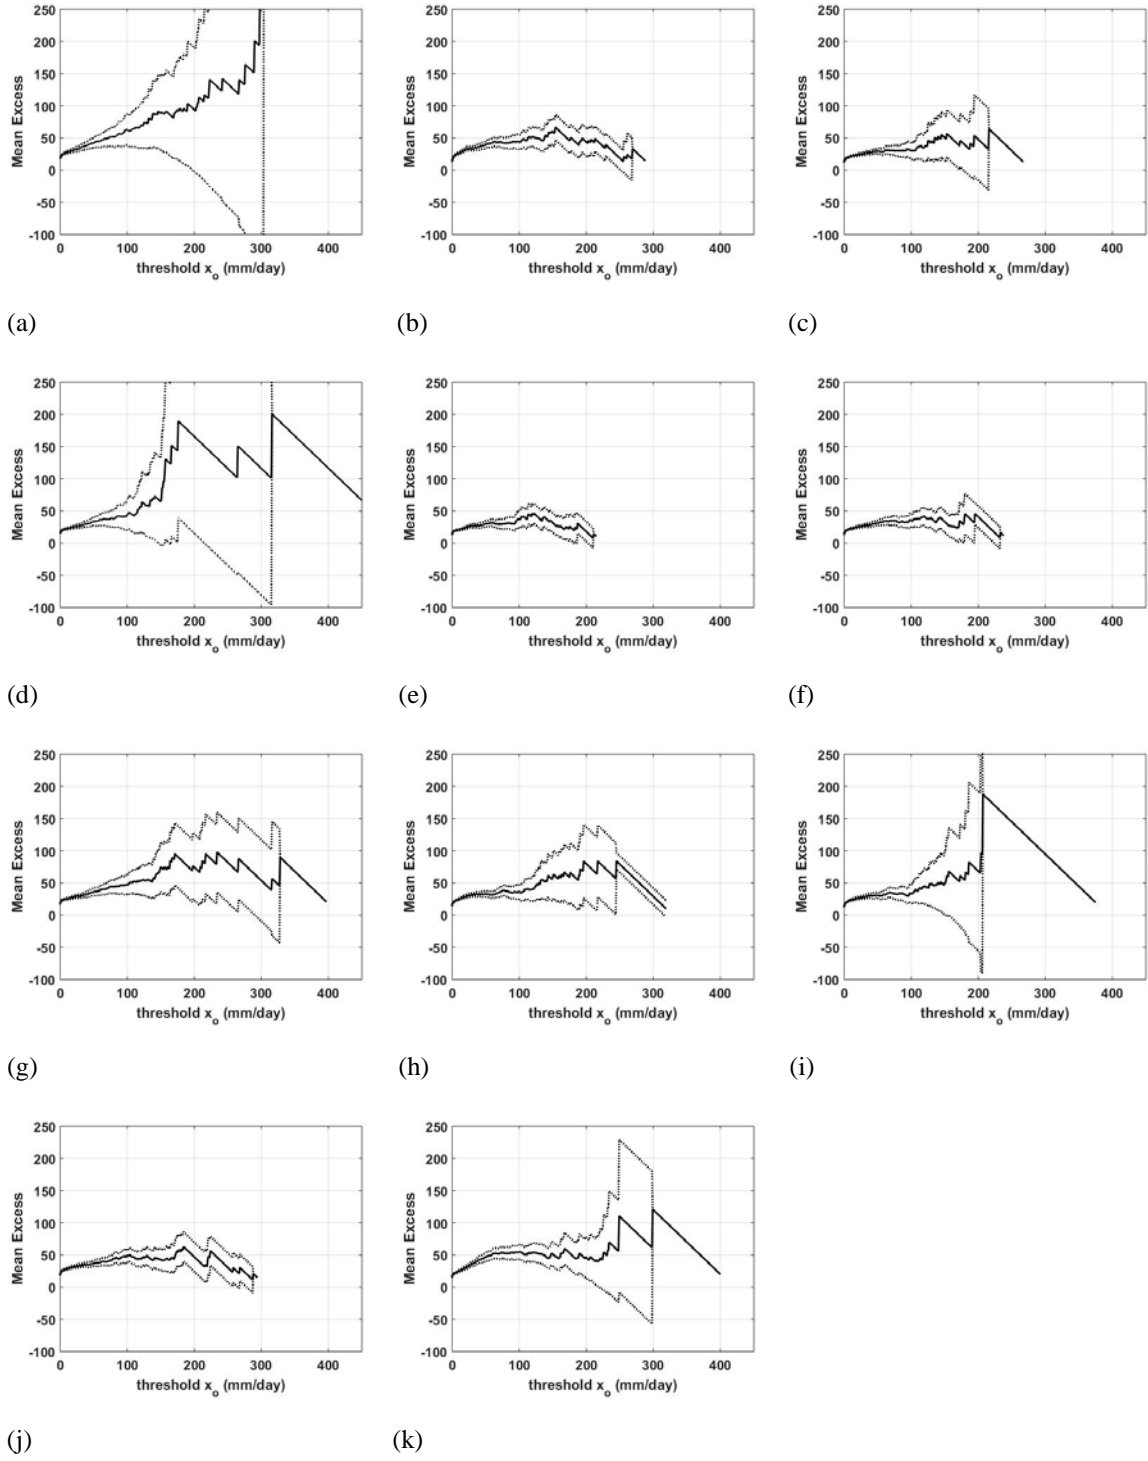

Figure S2. Mean residual life plot at (a) Ghangreung, (b) Incheon, (c) Chupungryeong, (d) Pohang, (e) Daegu, (f) Jeonju, (g) Ulsan, (h) Gwangju, (i) Mokpo, (j) Yeosu and (k) Jeju sites.

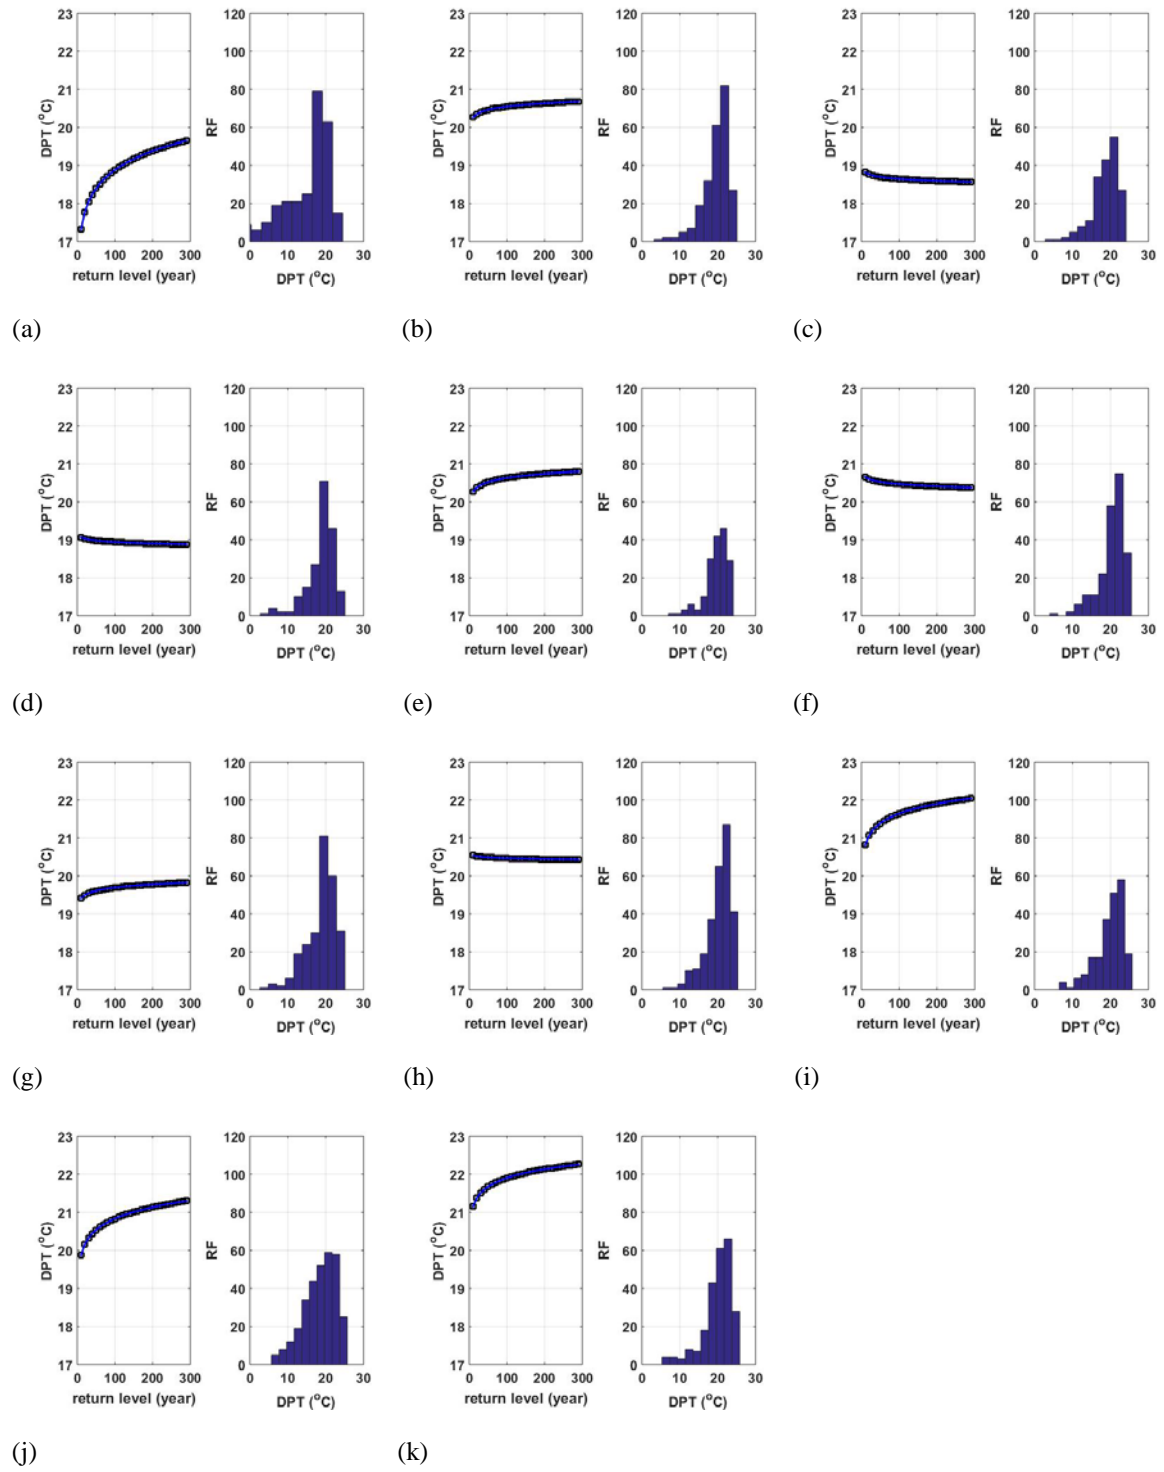

Figure S3. Selection of reference dew-point temperature for estimating rainfall quantiles at (a) Ghangreung, (b) Incheon, (c) Chupungryeong, (d) Pohang, (e) Daegu, (f) Jeonju, (g) Ulsan, (h) Gwangju, (i) Mokpo, (j) Yeosu and (k) Jeju sites. In this figure, 'RF' refers to the empirical relative frequency of DPT on the day of POT excess.



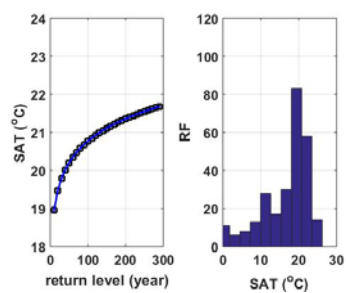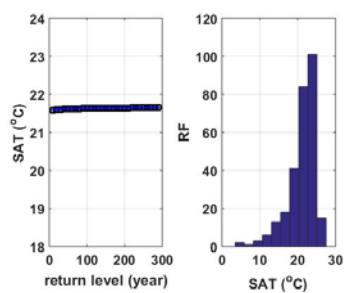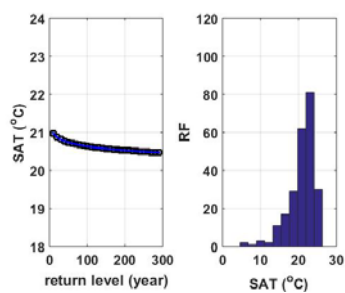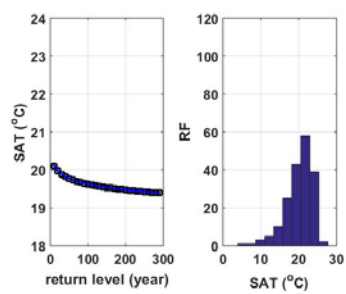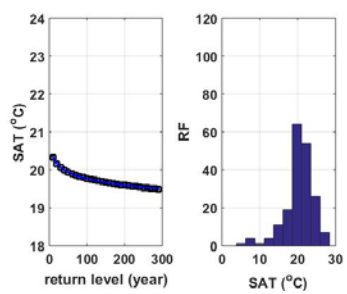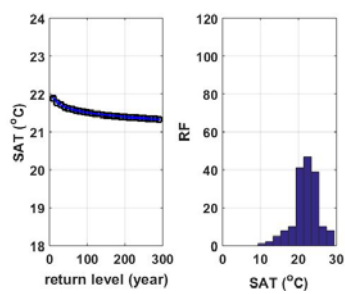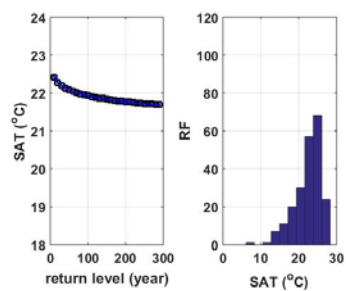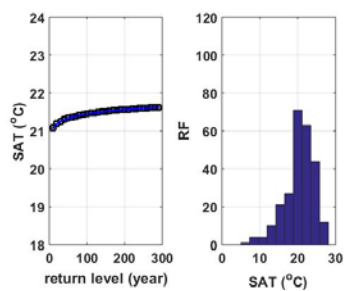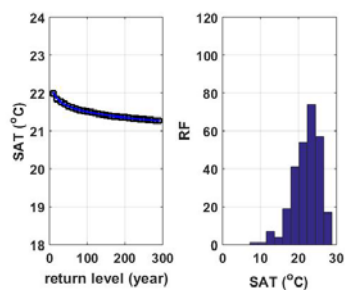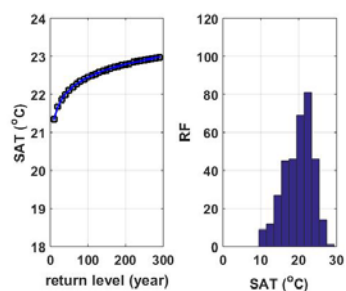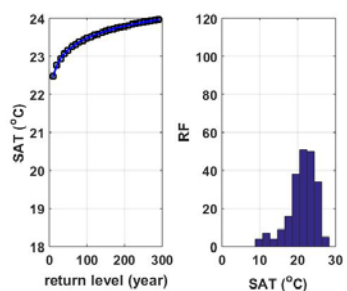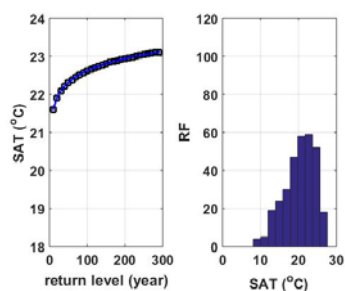

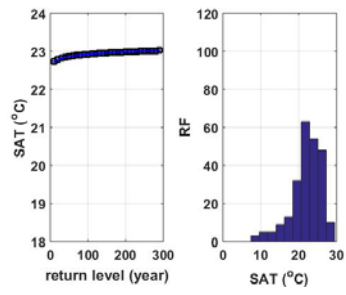

(m)

Figure S4. Selection of reference surface air temperature for estimating rainfall quantiles at (a) Ghangreung, (b) Seoul, (c) Incheon, (d) Chupungryeong, (e) Pohang, (f) Daegu, (g) Jeonju, (h) Ulsan, (i) Gwangju, (j) Busan, (k) Mokpo, (l) Yeosu and (m) Jeju sites. In this figure, 'RF' refers to the empirical relative frequency of SAT on the day of POT excess.
